# Supplementary material for: Infrequent Denture Cleaning Increased the Risk of Pneumonia among Community-dwelling Older Adults: A Population-based Cross-sectional Study
Source: PubMed Central journal article supplement (PMC6760190; doi:10.1038/s41598-019-50129-9), 2019-09-24
Supplement: 41598_2019_50129_MOESM1_ESM.pdf [file 41598_2019_50129_MOESM1_ESM.pdf]

**Supplementary Material for ‘Infrequent Denture Cleaning Increased the Risk of Pneumonia among Community-dwelling Older Adults: A Population-based Cross-sectional Study.’**

Taro Kusama,<sup>1</sup> Jun Aida,<sup>1\*</sup> Tatsuo Yamamoto,<sup>2</sup> Katsunori Kondo,<sup>3,4</sup> Ken Osaka<sup>1</sup>

1) Department of International and Community Oral Health, Tohoku University Graduate School of Dentistry, Aoba-ku, Sendai, Miyagi, Japan

2) Department of Disaster Medicine and Dental Sociology, Graduate School of Dentistry, Kanagawa Dental University, Yokosuka, Kanagawa, Japan

3) Department of Social Preventive Medical Sciences, Center for Preventive Medical Sciences, Chiba University, Chuo Ward, Chiba-shi, Chiba, Japan

4) Department of Gerontological Evaluation, Center for Gerontology and Social Science, National Center for Geriatrics and Gerontology, Obu city, Aichi, Japan

\*Corresponding author

Jun Aida

Department of International and Community Oral Health, Tohoku University Graduate School of Dentistry, Sendai, Japan.

Address: 4-1, Seiryomachi, Aoba-ku, Sendai, Miyagi, 980-8575, Japan.

E-mail: [j-aida@umin.ac.jp](mailto:j-aida@umin.ac.jp)

Tel: +81-22-717-7639

**Supplementary Table 1.** Standardized differences of covariate before and after stabilized average treatment effect weighting

|                                                                     | All participants<br>(n = 71,227) |          | 65 - 74y<br>(n = 35,349) |          | ≥75y<br>(n = 35,878) |          |
|---------------------------------------------------------------------|----------------------------------|----------|--------------------------|----------|----------------------|----------|
|                                                                     | Raw                              | Weighted | Raw                      | Weighted | Raw                  | Weighted |
| <b>Age</b>                                                          |                                  |          |                          |          |                      |          |
| 65 - 69y                                                            | 0.115                            | 0.021    | 0.124                    | 0.045    | —                    | —        |
| 70 - 74y                                                            | 0.031                            | 0.021    | 0.124                    | 0.045    | —                    | —        |
| 75 - 79y                                                            | 0.132                            | 0.023    | —                        | —        | 0.157                | 0.026    |
| 80 - 84y                                                            | 0.008                            | 0.019    | —                        | —        | 0.041                | 0.024    |
| ≥85y                                                                | 0.069                            | 0.009    | —                        | —        | 0.144                | 0.004    |
| <b>Sex</b>                                                          | 0.473                            | 0.051    | 0.546                    | 0.029    | 0.393                | 0.087    |
| <b>Education</b>                                                    |                                  |          |                          |          |                      |          |
| ≤9y                                                                 | 0.100                            | 0.019    | 0.048                    | 0.003    | 0.181                | 0.017    |
| 10 - 12y                                                            | 0.139                            | 0.020    | 0.104                    | 0.008    | 0.196                | 0.023    |
| ≥13y                                                                | 0.043                            | 0.002    | 0.066                    | 0.011    | 0.002                | 0.005    |
| <b>Equivalent income</b>                                            |                                  |          |                          |          |                      |          |
| <1,000,000JPY                                                       | 0.090                            | 0.014    | 0.080                    | 0.012    | 0.111                | 0.016    |
| 1,000,0000 - 1,999,999 JPY                                          | 0.020                            | 0.005    | 0.047                    | 0.010    | 0.014                | 0.014    |
| 2,000,0000 - 2,999,999 JPY                                          | 0.042                            | 0.011    | 0.041                    | 0.017    | 0.043                | 0.004    |
| 3,000,0000 - 3,999,999 JPY                                          | 0.042                            | 0.012    | 0.045                    | 0.017    | 0.043                | 0.008    |
| ≥4,000,000 JPY                                                      | 0.036                            | 0.020    | 0.055                    | 0.015    | 0.015                | 0.016    |
| <b>Smoking status</b>                                               |                                  |          |                          |          |                      |          |
| never                                                               | 0.335                            | 0.047    | 0.397                    | 0.039    | 0.257                | 0.067    |
| quite                                                               | 0.158                            | 0.040    | 0.165                    | 0.027    | 0.147                | 0.067    |
| current                                                             | 0.244                            | 0.012    | 0.273                    | 0.014    | 0.189                | 0.005    |
| <b>Dementia</b>                                                     | 0.184                            | 0.005    | 0.122                    | 0.005    | 0.242                | 0.007    |
| <b>Stroke</b>                                                       | 0.098                            | 0.013    | 0.090                    | 0.000    | 0.111                | 0.023    |
| <b>Activities of daily living</b>                                   | 0.272                            | 0.023    | 0.198                    | 0.007    | 0.366                | 0.029    |
| <b>Number of teeth</b>                                              |                                  |          |                          |          |                      |          |
| 0                                                                   | 0.163                            | 0.007    | 0.182                    | 0.015    | 0.172                | 0.002    |
| 1 - 4                                                               | 0.000                            | 0.002    | 0.024                    | 0.037    | 0.015                | 0.022    |
| 5 - 9                                                               | 0.029                            | 0.020    | 0.022                    | 0.006    | 0.032                | 0.049    |
| 10 - 19                                                             | 0.114                            | 0.022    | 0.133                    | 0.029    | 0.102                | 0.011    |
| ≥20                                                                 | 0.003                            | 0.034    | 0.002                    | 0.036    | 0.029                | 0.041    |
| <b>Experience of pneumococcal vaccination within last five-year</b> | 0.217                            | 0.012    | 0.128                    | 0.001    | 0.292                | 0.016    |

**Supplementary Table 2.** Effect modification of frequency of denture cleaning on the incidence of pneumonia within last one-year by age (n = 71,227)

|        | Cleaning denture daily                    |                    | Cleaning denture non-daily                |                    | aORs (95% CIs) for frequency of denture cleaning within strata of age group |
|--------|-------------------------------------------|--------------------|-------------------------------------------|--------------------|-----------------------------------------------------------------------------|
|        | n with/without the incidence of pneumonia | aOR (95% CI)       | n with/without the incidence of pneumonia | aOR (95% CI)       |                                                                             |
| 65-74y | 575/32,723                                | 1.00               | 34/1,720                                  | 0.99 (0.69 - 1.40) | 1.03 (0.72 - 1.47)                                                          |
| ≥75y   | 972/32,928                                | 1.20 (1.08 - 1.35) | 66/1,473                                  | 1.65 (1.26 - 2.16) | 1.37 (1.06 - 1.78)                                                          |

Measure of effect modification on additive scale: RERI (95% CI) = 0.46 (-0.08 - 1.00); *P* = 0.098

Measure of effect modification on multiplicative scale: aOR (95% CI) = 1.38 (0.90 - 2.15); *P* = 0.141

aORs are adjusted for age, sex, education, equivalent income, smoking status, dementia, stroke, ADL, number of teeth, and experience of pneumococcal vaccination within last five-year

Note: aOR = adjusted odds ratio, 95%CI = 95% confidence interval, RERI = relative excess risk due to interaction, ADL = Activities of daily living
